# Supplementary material
Source: PubMed Central journal article supplement (PMC6775780)
Supplement: NIHMS1046173-supplement-supplemental_file.pdf [file NIHMS1046173-supplement-supplemental_file.pdf]

## Supporting Information

### Tracking Tonic Dopamine Levels *in vivo* using Multiple Cyclic Square Wave Voltammetry

Yoonbae Oh<sup>a</sup>, Michael L. Heien<sup>b</sup>, Cheonho Park<sup>c</sup>, Yu Min Kang<sup>c</sup>, Jaekyung Kim<sup>c</sup>, Suelen Lucio Boschen<sup>a</sup>, Hojin Shin<sup>c</sup>, Hyun U Cho<sup>c</sup>, Charles D. Blaha<sup>a</sup>, Kevin E. Bennet<sup>a,d</sup>, Han Kyu Lee<sup>e</sup>, Sung Jun Jung<sup>e</sup>, Kendall H. Lee<sup>a,f,\*</sup>, and Dong Pyo Jang<sup>c,\*</sup>

<sup>a</sup> *Department of Neurologic Surgery, Mayo Clinic, Rochester, MN 55905, United States*

<sup>b</sup> *Department of Chemistry and Biochemistry, University of Arizona, Tucson, Arizona 85721, United States*

<sup>c</sup> *Department of Biomedical Engineering, Hanyang University, Seoul, 04763, Korea*

<sup>d</sup> *Division of Engineering, Mayo Clinic, Rochester, MN 55901, United States*

<sup>e</sup> *Department of Biomedical Science, Graduate School of Biomedical Science and Engineering, Hanyang University, Seoul, 04763, Korea*

<sup>f</sup> *Department of Physiology and Biomedical Engineering, Mayo Clinic, Rochester, MN 55905, United States*

<sup>\*</sup> *Corresponding authors at: Hanyang University, 222 Wangsimni-ro, Seongdong-Gu, Seoul, Korea. Mayo Clinic, 200 First Street SW, Rochester, MN 55905, USA. KHL and DPJ supervised all aspects of this work equally.*

*E-mail addresses and Fax number: dongpjang@hanyang.ac.kr, +82-2-2220-4949 (D.P. Jang)*

|                                                                                                        |    |
|--------------------------------------------------------------------------------------------------------|----|
| Electrode fabrication .....                                                                            | 3  |
| Preparation of brain slices for Ca <sup>2+</sup> imaging .....                                         | 3  |
| Biological experiments protocol .....                                                                  | 4  |
| Figure S-1: Cyclic square waveform .....                                                               | 5  |
| Figure S-2: Capacitive current response of M-CSWV and simulation .....                                 | 6  |
| Figure S-3: The envelopes of DA responses .....                                                        | 6  |
| Figure S-4: The examples of E <sub>SW</sub> effect on the DA response.....                             | 7  |
| Figure S-5: The examples of E <sub> Holding</sub> effect on the DA response.....                       | 7  |
| Figure S-6: Representative background-subtracted M-CSWV responses of DOPAC, AA, and pH<br>change ..... | 8  |
| Figure S-7: Representative background-subtracted M-CSWV responses of HVA, UA, and<br>Adenosine .....   | 9  |
| Figure S-8: <i>In vivo</i> feasibility test using brain slice of mouse striatum.....                   | 10 |
| Table S-1: Comparison of the different methods .....                                                   | 10 |
| References .....                                                                                       | 10 |

## **Electrode fabrication**

The carbon-fiber microelectrode (CFM) design was modified from our previous studies<sup>1,2</sup>. Each CFM was fabricated by isolating and inserting a single carbon fiber (AS4,  $d = 7\mu\text{m}$ ; Hexel, Dublin, CA) into a silica tubing ( $20\mu\text{M}$  ID,  $90\mu\text{M}$  OD,  $10\mu\text{M}$  coat with polyimide; Polymicro Technologies, Phoenix, AZ). The connection between the carbon fiber and the silica tubing was covered with polyamic acid (Sigma-Aldrich, St. Louis, MO) and heated to  $200^\circ\text{C}$  to polymerize the polyamic acid into a polyimide film. The silica tubing was then attached to a nitinol (Nitinol #1, an alloy of nickel and titanium; Fort Wayne Metals, IN) extension wire with a silver-based conductive paste<sup>1</sup>. The carbon fiber attached nitinol wire was insulated with polyimide tubing ( $0.0089''$  ID,  $0.0134''$  OD,  $0.00225''$  WT; Vention Medical, Salem, NH) except the carbon fiber sensing part. The exposed carbon fiber was trimmed under a dissecting microscope to a length of approximately  $50\mu\text{m}$ . Teflon-coated silver wire (A-M systems, Inc., Sequim, WA) was prepared as an Ag/AgCl reference electrode and chlorinating the exposed tip in saline with a 9 V dry cell battery.

## **Preparation of brain slices for $\text{Ca}^{2+}$ image**

After rapid extraction of mouse brain,  $300\mu\text{M}$  horizontal striatum slices were prepared using a Vibratome 1000 (The Vibratome Company, St. Louis, MO). After a minimum period of 60 to 90 minutes, the slices were continuously perfused with oxygenated artificial cerebrospinal fluid solution ( $28\text{--}30^\circ\text{C}$ ) (in mM; NaCl 125, KCl 2.5,  $\text{CaCl}_2$  2,  $\text{NaHCO}_3$  26,  $\text{NaH}_2\text{PO}_4$  1.25,  $\text{MgCl}_2$  1, glucose 25, pH 7.4 when bubbled with 95%  $\text{O}_2$  and 5%  $\text{CO}_2$ ) in a submersion-type recording chamber. In  $\text{Ca}^{2+}$  image analysis,  $\text{Ca}^{2+}$  response of striatal neurons was measured using the fluorescent  $\text{Ca}^{2+}$  probe (indicator) Fluo-3 AM (10 mM, Enzo Life Science, Farmingdale, NY) mixed with 1 ml pluronic acid (20% solution in DMSO, Life Technologies) in DMEM medium (with 10% FBS) for 40 min at  $37^\circ\text{C}$ . Fluo-3 loaded slices on coverslip were mounted onto the chamber (12mm ChamSlide AC, total volume of 500  $\mu\text{l}$ , Live Cell Instrument, Korea), and placed onto an inverted microscope (Olympus IX70, Japan). Cells were excited with a LED

source pE-100 (CoolLED, UK) at 470 nm and emissions were recorded at 535 nm wavelengths, Fluorescent emission readings were recorded and stored on hard disk every 0.5 s. Intracellular concentrations ( $[Ca^{2+}]_i$ ) were measured by digital video microfluorometry with an intensified charge-coupled-device (CCD) camera (QIClick, QImaging, Canada) coupled to the microscope and a computer with software (MetaMorph® NX, Molecular Devices).  $Ca^{2+}$  responses were presented as a pseudo ratio ( $\Delta F/F$ ) to estimate comparison fluorescence intensity, because Fluo 3-AM is a non-ratiometric  $Ca^{2+}$  indicator. Single-wavelength values are different depending on the concentration of loaded dye in respective cells. Following formula indicates pseudo ratio.<sup>3</sup>

$$\Delta F/F = (F_1 - F_{base}) / F_{base}$$

$F_1$  = measured intensity of the cell after stimulation

$F_{base}$  = measured intensity of the cell before stimulation

### **Biological experiments protocol**

Rats were housed with a 12:12 hr light and dark cycle (lights on at 0600 hr) with *ad libitum* access to food and water. The rats were anesthetized with an injection of urethane (1.6 g/kg, i.p.) and stabilized in a commercially available stereotaxic frame (David Kopf Instruments, Tujunga, CA) for the surgery. A longitudinal incision was made on the skin to expose the skull and three burr holes (0.5-1.0 mm diameter) were made in the skull of each rat for the implantation of a CFM, a bipolar electrical stimulating electrode (Plastic One, MS303/2, Roanoke, VA, USA) and an Ag/AgCl reference electrode. The reference electrode was positioned superficially in cortical tissue contralateral to the CFM and stimulating electrode. Electrode coordinates were referenced by a rat brain atlas<sup>4</sup> based on flat-skull position using bregma and dura as reference points with coordinates anteroposterior (AP), mediolateral (ML), and dorsoventral (DV). The CFM was placed in the right hemisphere in the dorsomedial striatum (AP +1.0 mm; ML +2.5 mm; DV -4.5

to -5.5 mm), and the stimulating electrode was inserted ipsilaterally just above the medial forebrain bundle (MFB, AP -4.8; ML +1.0; DV -8.0 to -9.0). A train of bipolar pulses (2 ms pulse width, 200  $\mu$ A, 60 Hz) using WINCS Harmoni electrometer was delivered for 2 seconds to identify dopamine releasing sites in the striatum. FSCV signal was synchronized with electrical stimulation in order to interleave intervals of stimulation during FSCV scans<sup>5</sup>. Thus, electrical stimulation was not applied when the FSCV pulses (about 10ms) were delivered. The CFM and the electrical stimulating electrode were gradually adjusted until a robust phasic DA signal was detected at the CFM using FSCV.<sup>6</sup> Immediately thereafter, a M-CSWV waveform was applied at 0.1 Hz for ~10 minutes to allow stabilization of the recorded electrochemical signal. Striatal tonic DA levels were collected for one hour, then saline, 20mg/kg nomifensine, or 75mg/kg pargyline was injected i.p. and tonic DA levels were collected for additional 2 hours.

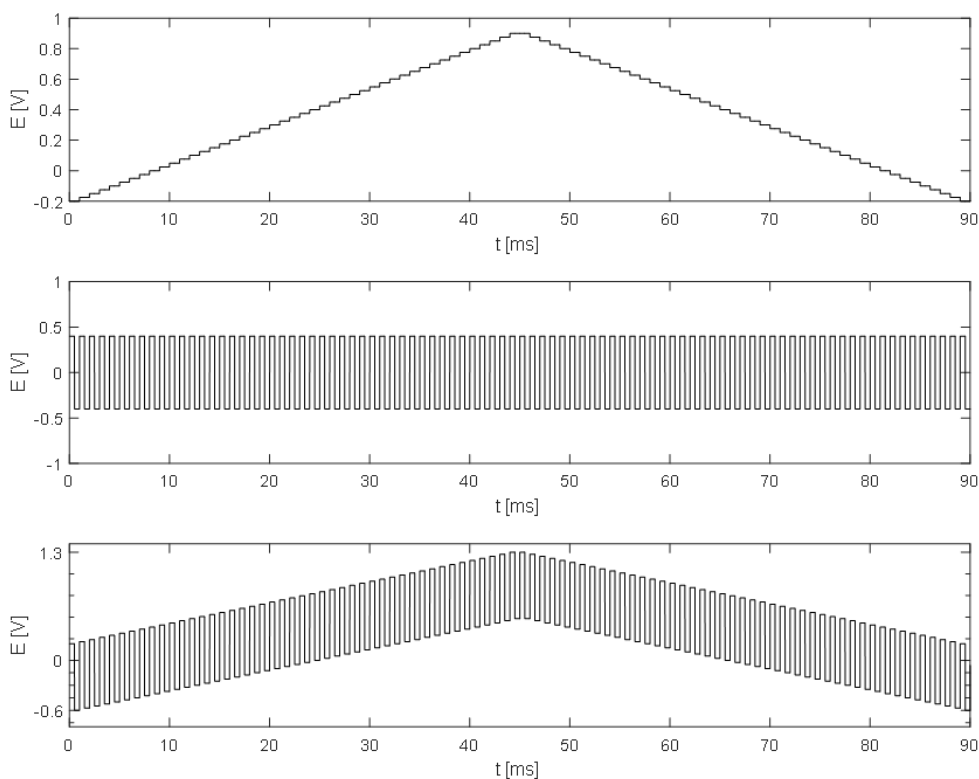

Figure S-1 Cyclic square waveform used throughout this study

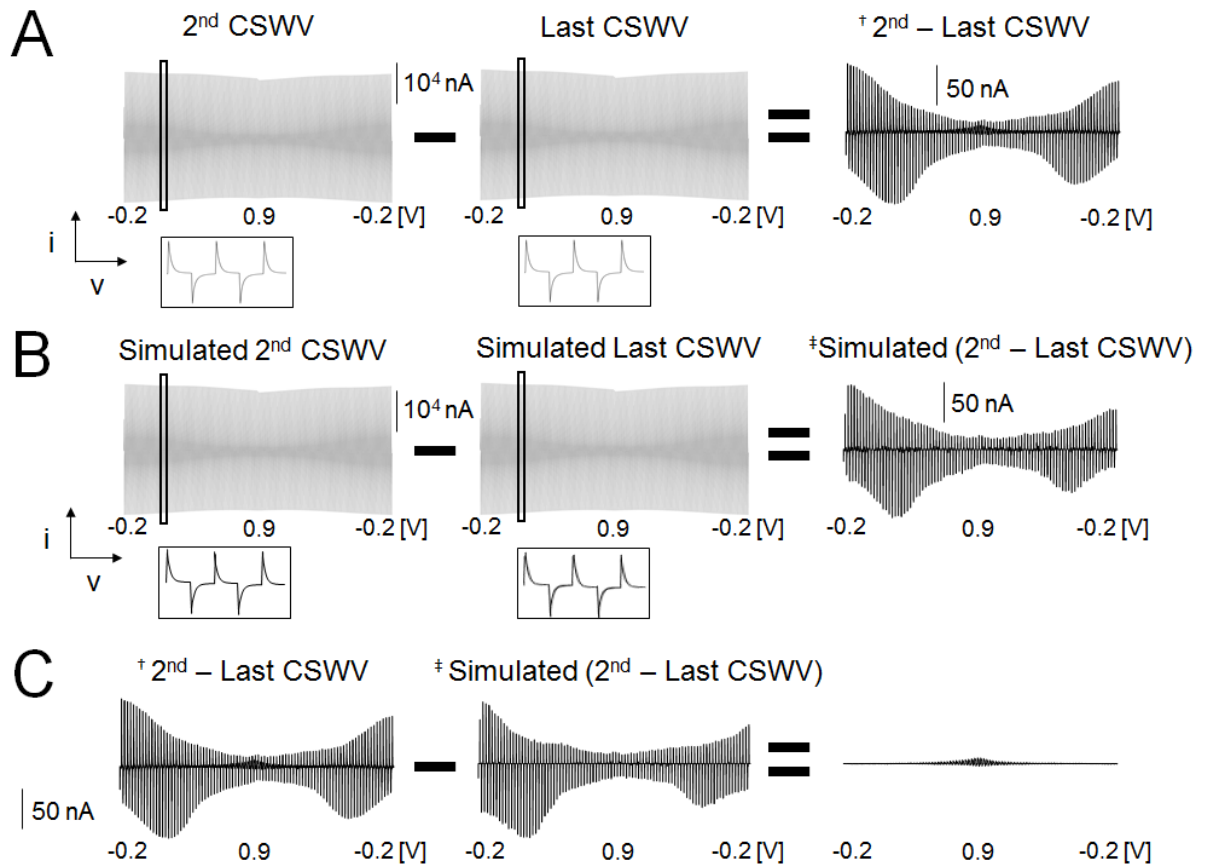

Figure S-2 Capacitive current response of M-CSWV and its modelling. (A) The background current and its difference between 2<sup>nd</sup> and last CSWV. (B) Modelled 2<sup>nd</sup> and last CSWV background current and its difference. (C) Capacitive current removal by subtracting modelled CSWV from raw data.

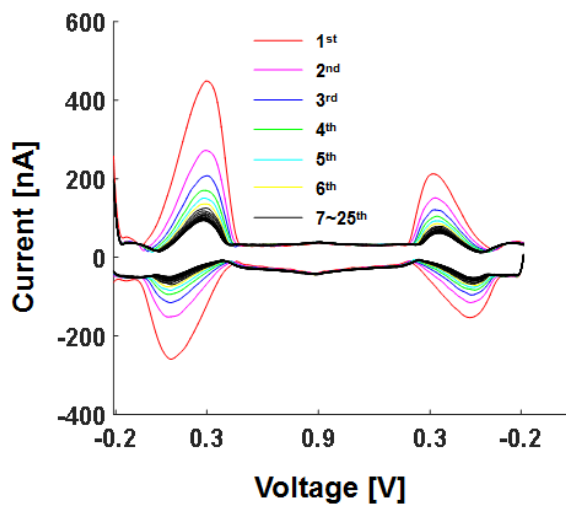

Figure S-3 Envelopes of DA responses. 25 cyclic square waveforms were used.

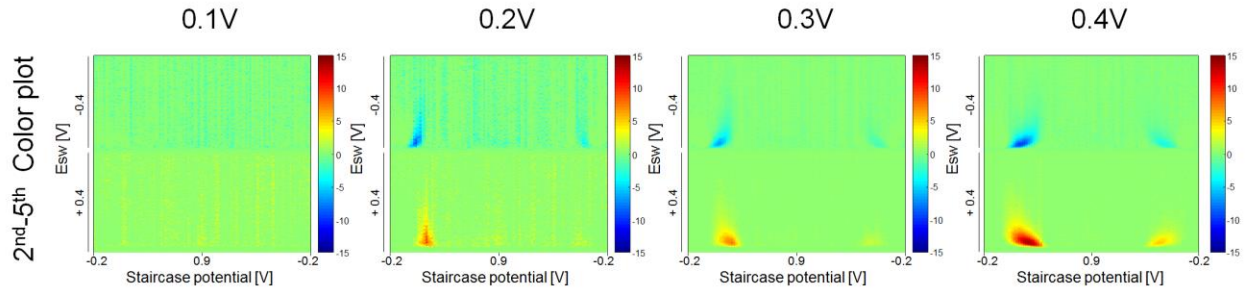

Figure S-4 Examples of  $E_{SW}$  effect on the DA response.

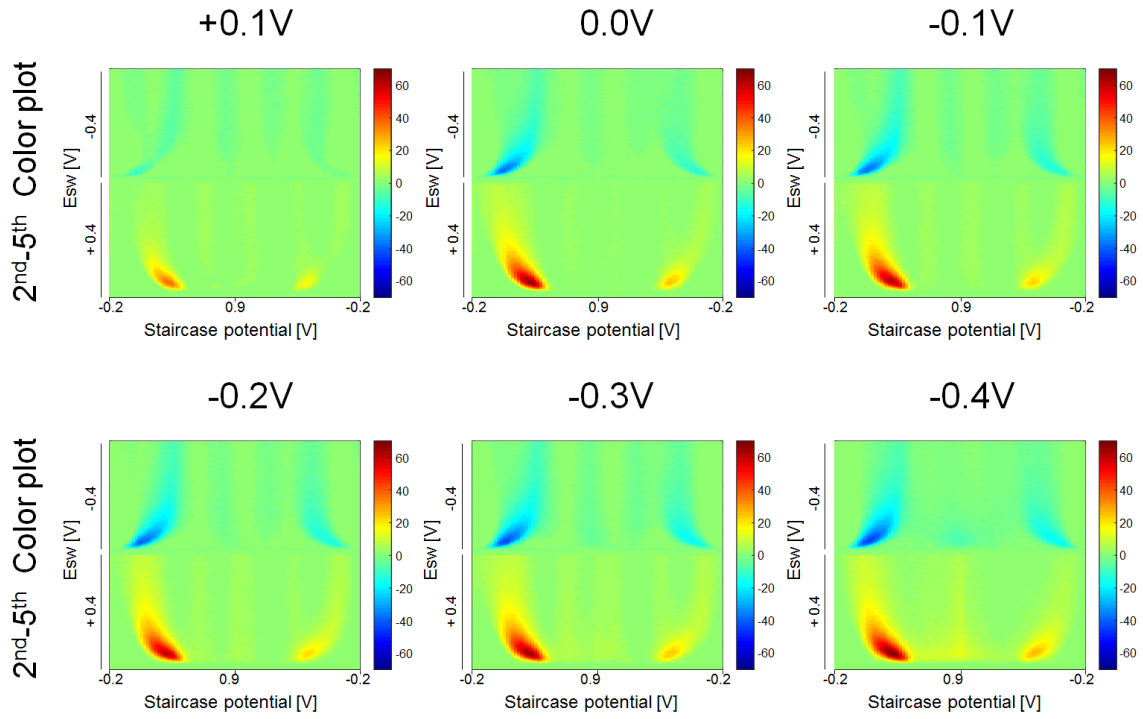

Figure S-5 Examples of  $E_{Holding}$  effect on the DA response.

### A DOPAC 20 $\mu$ M

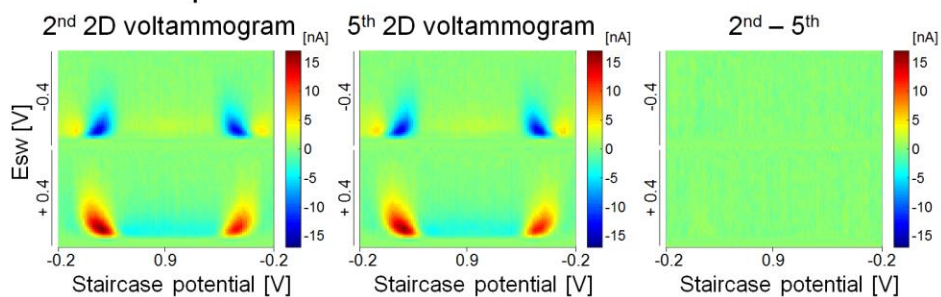

### B AA 200 $\mu$ M

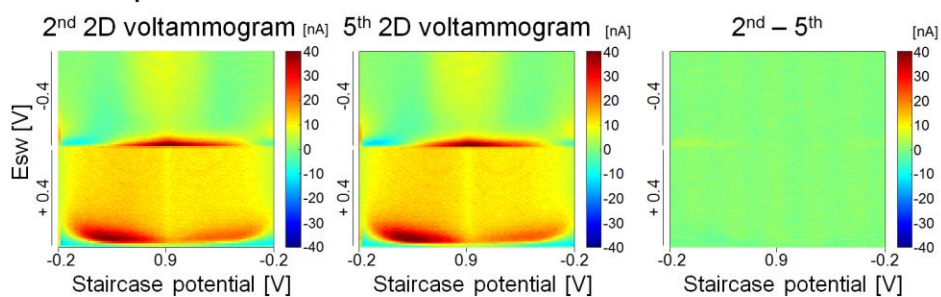

### C pH $\Delta$ -0.2

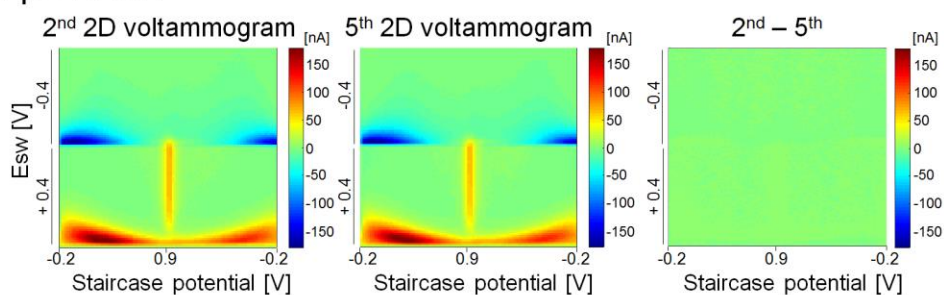

Figure S-6. Representative background-subtracted M-CSWV responses of DOPAC, AA, and pH change. (A) Representative background-subtracted 2D voltammograms of 20 $\mu$ M DOPAC. DOPAC can be offset by subtracting 2<sup>nd</sup> and 5<sup>th</sup> CSWV. (B) Representative background-subtracted 2D voltammograms of AA 200 $\mu$ M. (C) Representative background-subtracted 2D voltammograms of pH changes.



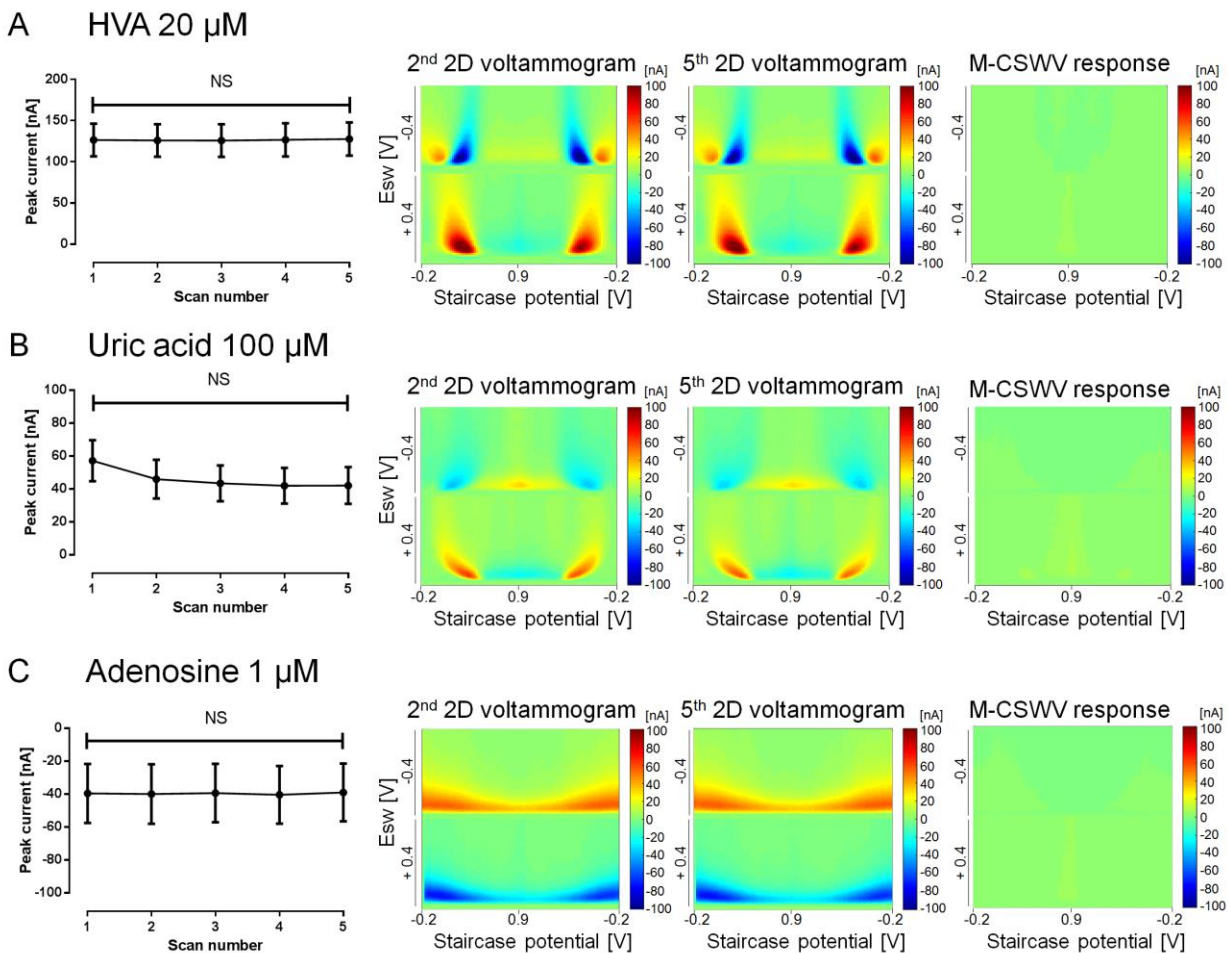

Figure S-7. Representative background-subtracted M-CSWV responses for homovanillic acid (HVA), uric acid (UA), and adenosine. (A) Peak oxidation currents of background-subtracted M-CSWV for HVA (20 $\mu\text{M}$ ). HVA responses from 1st to 5th CSWV showed no significant differences ( $n=3$ , one-way ANOVA test, left panel). Representative background-subtracted 2D voltammograms of 20 $\mu\text{M}$  HVA (middle two pseudo color plots). HVA can be offset by subtracting 2<sup>nd</sup> and 5<sup>th</sup> CSWV (right panel). (B) Uric acid (100 $\mu\text{M}$ ) responses from 1st to 5th CSWV showed no significant differences ( $n=3$ , one-way ANOVA test, left panel). Representative background-subtracted 2D voltammograms of Uric acid. (C) Adenosine (1 $\mu\text{M}$ ) responses from 1st to 5th CSWV showed no significant differences ( $n=3$ , one-way ANOVA test, left panel). Representative background-subtracted 2D voltammograms of adenosine.

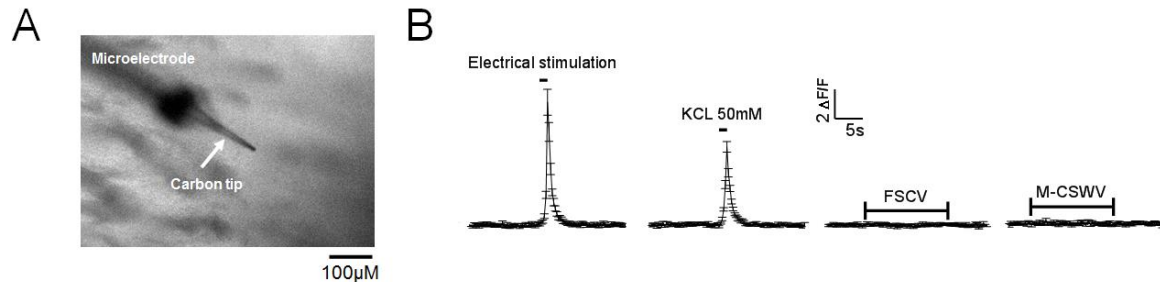

Figure S-8 *In vivo* feasibility test using brain slice of mouse. (A) CFM placement in the brain tissue. (B) Fluo-3 changes during experiments.

| Method                                                        | Target location   | Quantified tonic dopamine level | Refs      |
|---------------------------------------------------------------|-------------------|---------------------------------|-----------|
| Amperometric monitoring with glass-sealed gold nanoelectrode  | nucleus accumbens | $41 \pm 13$ nM                  | 7         |
| Fast-scan controlled-adsorption voltammetry                   | nucleus accumbens | $90 \pm 9$ nM                   | 8         |
| Microdialysis using online capillary liquid chromatography    | striatum          | $10.7 \pm 1.5$ nM               | 9         |
| Reverse microdialysis with stearate-graphite paste electrodes | striatum          | $86 \pm 6$ nM                   | 10        |
| Multiple cyclic square wave voltammetry                       | striatum          | $120 \pm 18$ nM                 | This work |

Table S-1 Comparison of the different methods for the determination of tonic dopamine levels in rat brain

- (1) Chang, S. Y.; Kimble, C. J.; Kim, I.; Paek, S. B.; Kressin, K. R.; Boesche, J. B.; Whitlock, S. V.; Eaker, D. R.; Kasasbeh, A.; Horne, A. E.; Blaha, C. D.; Bennet, K. E.; Lee, K. H. *J Neurosurg* **2013**, *119*, 1556-1565.
- (2) Chang, S. Y.; Kim, I.; Marsh, M. P.; Jang, D. P.; Hwang, S. C.; Van Gompel, J. J.; Goerss, S. J.; Kimble, C. J.; Bennet, K. E.; Garris, P. A.; Blaha, C. D.; Lee, K. H. *Mayo Clin Proc* **2012**, *87*, 760-765.
- (3) Takahashi, A.; Camacho, P.; Lechleiter, J. D.; Herman, B. *Physiological reviews* **1999**, *79*, 1089-1125.
- (4) Paxinos, G.; Watson, C. *New York: Academic* **1998**.
- (5) Lee, K. H.; Lujan, J. L.; Trevathan, J. K.; Ross, E. K.; Bartoletta, J. J.; Park, H. O.; Paek, S. B.; Nicolai, E. N.; Lee, J. H.; Min, H.-K. *Scientific reports* **2017**, *7*, 46675.
- (6) Bennet, K. E.; Kim, I. Y.; Lee, K. H.; Jang, D. P. *Int. J. Electrochem. Sci* **2015**, *10*, 10061-10073.
- (7) Ding, S.; Liu, Y.; Ma, C.; Zhang, J.; Zhu, A.; Shi, G. *Electroanalysis* **2018**, *30*, 1041-1046.
- (8) Atcherley, C. W.; Wood, K. M.; Parent, K. L.; Hashemi, P.; Heien, M. L. *Chemical communications* **2015**, *51*, 2235-2238.

(9) Gu, H.; Varner, E. L.; Groskreutz, S. R.; Michael, A. C.; Weber, S. G. *Analytical chemistry* **2015**, *87*, 6088-6094.

(10) Blaha, C. D. *Pharmacology Biochemistry and Behavior* **1996**, *55*, 351-364.
